# Supplementary material
Source: PubMed Central journal article supplement (PMC2535940)
Supplement: NIHMS63039-supplement-1si20060823_09.pdf [file NIHMS63039-supplement-1si20060823_09.pdf]

**Supporting Information for:**

**Core-Shell and Segmented Polymer-Metal Composite Nanostructures**

Michal Lahav, Emily A. Weiss, Qiaobing Xu, and George M. Whitesides\*

*Department of Chemistry and Chemical Biology, Harvard University,*

*12 Oxford Street, Cambridge, MA 02138*

\*To whom correspondence may be addressed. Phone: 617-495-9430. Fax: 617-495-9857. E-mail: gwhitesides@gmwhgroup.harvard.edu

**Electrochemical Procedures.** Anodized aluminum oxide (AAO) membranes (Whatman, pore size = 0.2  $\mu\text{m}$ , thickness =  $\sim 60 \mu\text{m}$ , area = 2.3  $\text{cm}^2$ , density =  $\sim 10^8$  pores per membrane) were purchased from VWR.

*Galvanostatic Deposition of Metal.* All electroplating solutions—Oromerse BR Gold, pH  $\sim 10.2$  (gold); Orotemp 24 “C”, pH  $\sim 7.4$  (gold); nickel sulfamate RTU (Techni nickel “S”), pH  $\sim 5.5$  (nickel); Techni-silver E-2 (silver), pH  $\sim 12.5$ ; and Techni Copper PC 75 (copper), pH  $\sim 3.5$ —were purchased from Technic, Inc., Cranston RI. All metals were plated at a current density of 0.5  $\text{mA}/\text{cm}^2$  using a potentiostat/galvanostat (Princeton Applied Research 273A). Platinum foil served as the counter electrode.

*Potentiostatic Deposition of Polyaniline.* Aniline (puriss  $>99.5\%$ , Fluka) was purchased from Aldrich and distilled at  $90^\circ\text{C}/30 \text{ mmHg}$  before use. Electropolymerization using a bipotentiostat (Pine, AFCBP1) was carried out at +0.8 V vs. Ag/AgCl from a solution of 0.1 M aniline in 0.5 M  $\text{Na}_2\text{SO}_4$ , 0.1 M  $\text{H}_2\text{SO}_4$  (aq, pH  $\sim 1$ ). Platinum foil served as the counter electrode.

**Plasma Etching.** To make the gold nanotubes (Figures 3, S1), the PANI-Au core-shell sample was exposed to oxygen plasma (300 mTorr, 18 W) for 5 min using an SPI Plasma Prep II (West Chester, PA).

**Scanning Electron Microscopy (SEM) and Electron Backscattered Diffraction (EBSD).**

For imaging, a small portion of each membrane containing the PANI-metal composite was cut out and placed on an SEM stub (held by conductive carbon tape). The membrane was then dissolved by covering it with a drop of 1 M NaOH for 90 minutes, washing with copious amounts of de-ionized water, and drying in air. The samples were imaged with a Leo SEM (Model 982, resolution: 4 nm at 1 keV) under high vacuum ( $10^{-7}$  torr) using a 2-3 keV electron beam. The SEM was equipped with an EBSD system. The EBSD measurements were performed at a working distance of 13 mm, and an electron beam energy of 15 keV.

**Figure S1.** **A)** Large-area SEM image of the gold nanotubes pictured in Figure 2.

**B)** The EBSD spectrum of the boxed region in Figure S1A (the fibrous material that is tethered to the inside of the gold nanotubes) from 0 – 6 keV and 7.5 – 15 keV (inset). This spectrum identifies the fibrous material as gold.

**Scheme S1:** Alternate procedure for preparation of the segmented polymer-metal nanostructures (without forming the SAM of thioaniline on the Au rods): **1)** electrodeposition of Au; **2)** electropolymerization of PANI; **3)** dissolution of the AAO membrane. (This method leads to detachment of the PANI tubes from the gold upon dissolution of the membrane.)

**Figure S2.** SEM images of Au rods (**A:** side view, **B:** top view) that result from Scheme S1.

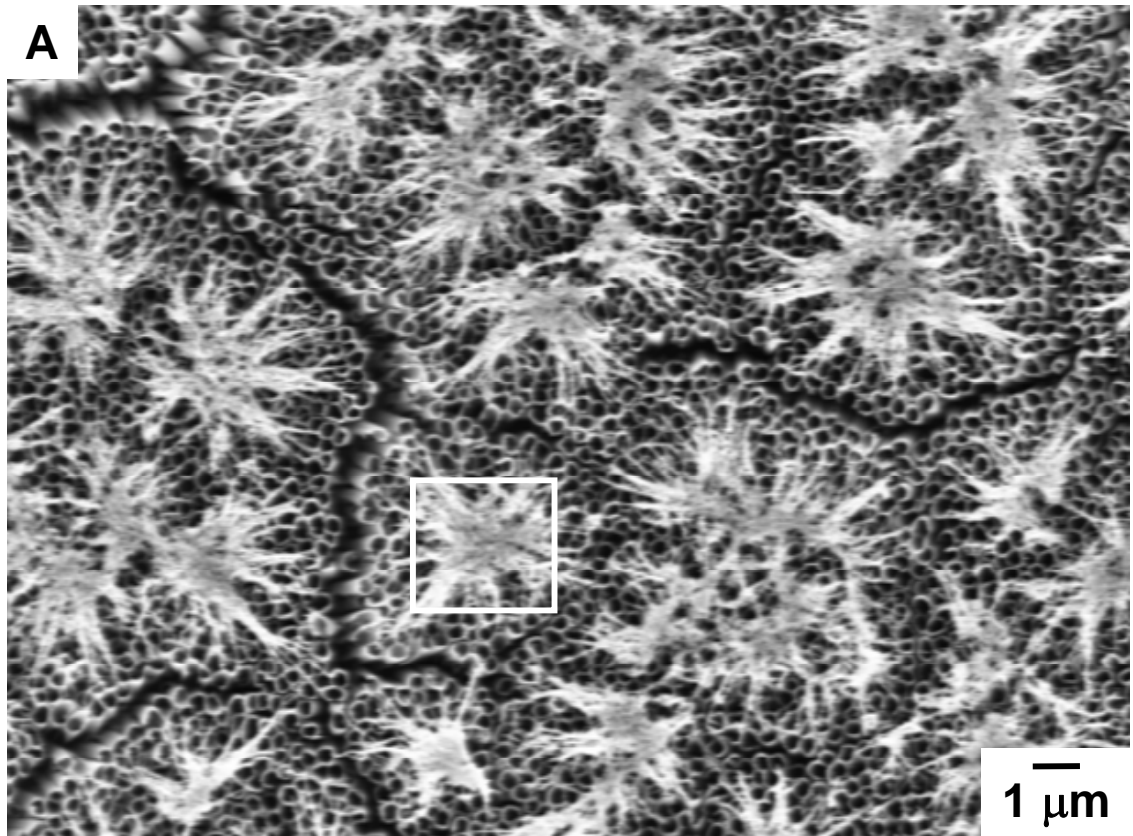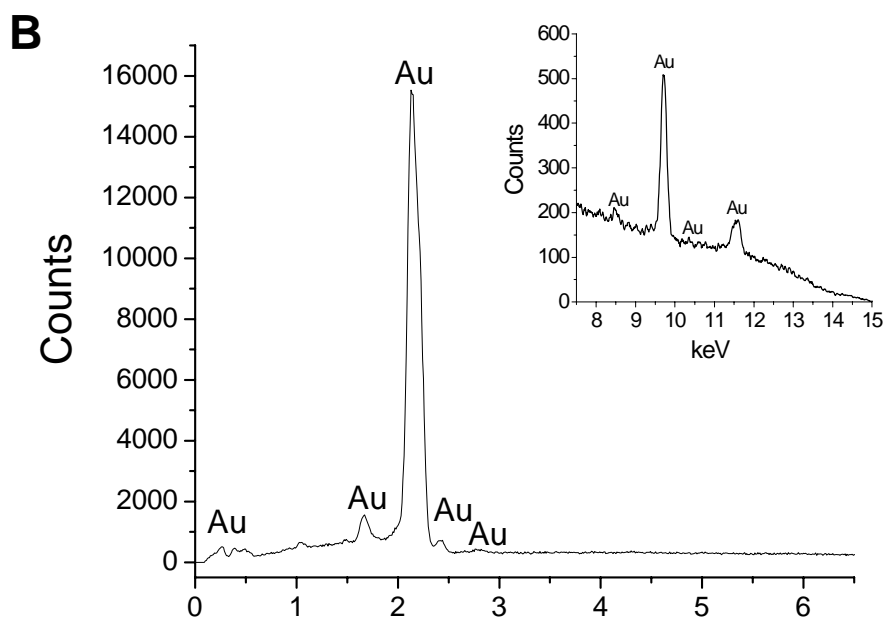

Figure S1.

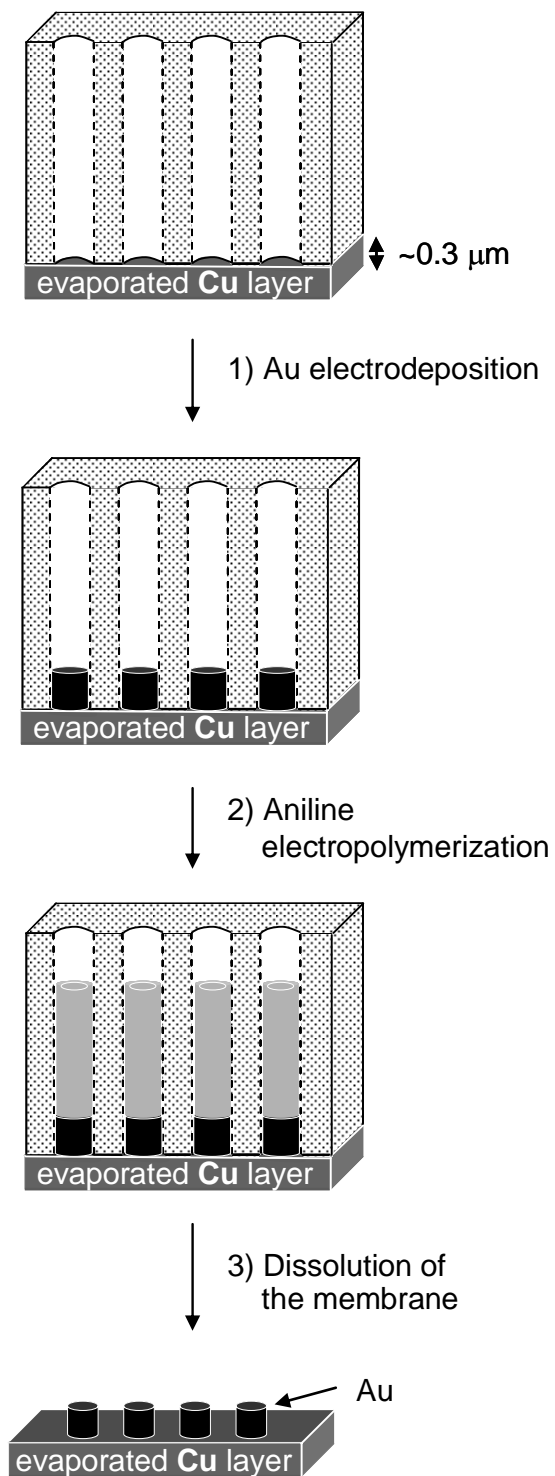

**Scheme S1.**

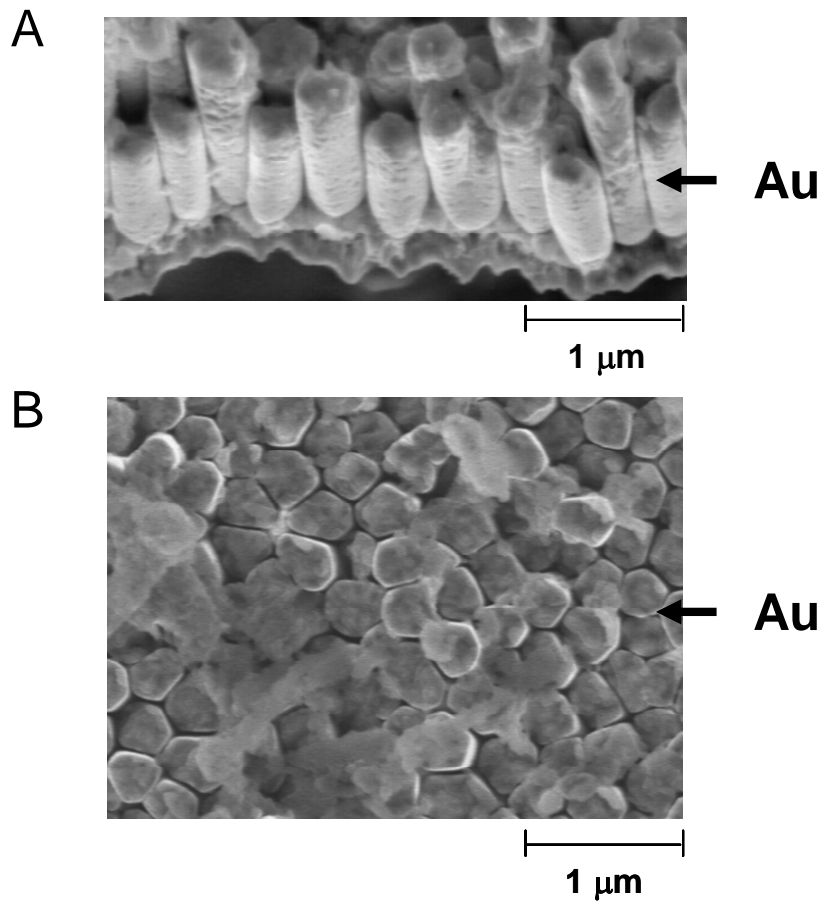

**Figure S2.**
